# Supplementary material for: Mucospheres produced by a mixotrophic protist impact ocean carbon cycling
Source: PubMed Central journal article supplement (PMC8921327; doi:10.1038/s41467-022-28867-8), 2022-03-14
Supplement: 41467_2022_28867_MOESM2_ESM.pdf [file 41467_2022_28867_MOESM2_ESM.pdf]

### **Description of Additional Supplementary Files**

File Name: Supplementary Data 1

Description: Spreadsheet detailing how the carbon export potential of mucospheres produced by *P. cf. balticum* were calculated.

File Name: Supplementary Movie 1

Description: Evidence of mucosphere production, prey capture and peduncular phago-heterotrophic consumption by *P. cf. balticum*.
